# Supplementary material for: Is there evidence for a 4.2 ka BP event in the northern North Atlantic region?
Source: Copernicus journal article supplement (doi:10.5194/cp-2018-162), 2019-01-16
Supplement: Supplementary file [file cp-2018-162-AC3-supplement.pdf]

1 **Is there evidence for a 4.2ka B.P. event in the northern North Atlantic region?**

2 Raymond S. Bradley<sup>1</sup> and Jostein Bakke<sup>2</sup>

3

4 <sup>1</sup>Department of Geosciences/Climate System Research Center, University of Massachusetts,  
5 Amherst

6 <sup>2</sup>Department of Earth Science/Bjerknes Centre for Climate Research, University of Bergen

7

8 **Abstract**

9 We review paleoceanographic and paleoclimatic records from the northern North Atlantic to assess  
10 the nature of climatic conditions at 4.2ka BP, which has been identified as a time of exceptional  
11 climatic anomalies in many parts of the world. The northern North Atlantic region experienced  
12 relatively warm conditions in from 6-8ka B.P., followed by a general decline in temperatures after  
13 ~5ka B.P., which led to the onset of Neoglaciation. Over the last 5000 years, a series of multi-  
14 decadal to century scale fluctuations occurred, superimposed on an overall decline in temperature.  
15 Although a few records do show a glacial advance around 4.2ka B.P., because they are not  
16 widespread we interpret them as local events -- simply one glacial advance of many that occurred  
17 in response to the overall climatic deterioration that characterized the late Holocene.

18

19 **1. Introduction**

20 The North Atlantic is a key area in the global climate system because changes in atmospheric and  
21 oceanographic conditions in this region can have widespread effects on global climate. It is the  
22 core region for ventilation of the North Atlantic which drives the Atlantic Meridional Overturning  
23 Circulation (AMOC), with global teleconnections through the conveyor belt system of ocean  
24 currents. Detailed studies of two sediment cores in the North Atlantic (at ~65° and ~54°N) by  
25 Bond et al (1997) revealed quasi-periodic variations in the percentage of hematite-stained grains  
26 and Icelandic glass during the Holocene, which were interpreted as evidence for pulses of ice-  
27 rafting. They argued that during these episodes, “*cool, ice-bearing surface waters shifted across*  
28 *more than 5° of latitude, each time penetrating well into the core of the North Atlantic Current*”.  
29 One of the 8 Holocene episodes (later dubbed “Bond events”) occurred at ~4.2ka calendar years  
30 B.P. Given that this is the time at which exceptional climatic anomalies appear to have occurred

31 in many parts of the world (“the 4.2ka B.P. event”) it is important to re-assess the evidence for  
32 disruption of the North Atlantic Current at that time.

33 Bond et al. (2001) argued that the colder episodes they had identified were driven by a  
34 reduction in solar insolation (cf. Wanner and Bütikofer, 2008; Wanner et al., 2011),  
35 notwithstanding the fact that total solar irradiance did not vary by more than  $\pm 0.15\%$  over this  
36 period (Vieira et al., 2011; Roth and Joos, 2013; Wu et al. 2018). Nevertheless, the literature is  
37 replete with studies that have tried to link diverse paleoclimatic records from around the world to  
38 the timing of Bond events (e.g. Fleitmann et al., 2003; Gupta et al., 2003; Wang et al., 2005;  
39 Pèlachs et al., 2011), despite the fact that other paleoceanographic studies have been unable to  
40 reproduce the record of ice-rafting reported in Bond et al., (1997) (e.g. Andrews et al., 2014). Here  
41 we review sedimentary records from the northern North Atlantic (north of  $60^{\circ}\text{N}$ ) with a specific  
42 focus on whether there is evidence for an “event” around 4.2ka B.P. We do not focus on records  
43 from Iceland as these have been reviewed separately by Geirsdóttir et al. (2019).

44 The North Atlantic has a very distinct pattern of sea surface temperatures, reflecting the ocean  
45 currents that traverse the region (Figure 1). Warm sub-tropical water enters the region from the  
46 southwest via the Gulf Stream (North Atlantic Current) and this transfers heat to sub-polar latitudes  
47 north of Scandinavia by way of the Norwegian Atlantic and West Spitsbergen currents, as well as  
48 around the western and northwestern coast of Iceland via the Irminger current. In contrast, cold  
49 polar water exits the Arctic Ocean via the East Greenland current, which extends to the southern  
50 tip of Greenland. The region between these water masses is where deepwater formation occurs,  
51 driving the large-scale Atlantic Meridional Overturning Circulation (AMOC). On the timescale of  
52 the Holocene, there have been significant changes in the characteristics and position of these major  
53 oceanographic features, as recorded by various paleoceanographic proxies.

54

## 55 **2. Paleoceanographic evidence**

56 First, we consider a transect of sediment cores that are aligned along the axis of the main influx of  
57 Atlantic water entering the North Atlantic, from west of the UK to Svalbard (Figure 1). We focus  
58 on those studies that have provided estimates of paleo sea-surface temperatures. Effectively, this  
59 means only those that have analyzed alkenones and diatoms, which reflect conditions in the photic  
60 zone or mixed layer near the ocean surface. Figure 1 shows the location of all available Holocene  
61 alkenone-based paleotemperature estimates (Figure 2; see references in the caption). These

62 indicate that SSTs were higher in the early Holocene, with the largest anomalies (relative to today)  
63 at high latitudes (that is, there was strong polar amplification of the warming) (Andersson et al.,  
64 2010). This early Holocene warming was a consequence of orbital forcing: June/July insolation  
65 was ~10% higher than today at the start of the Holocene in the northern parts of the region, but the  
66 peak warming was delayed due to the influence of the decaying Laurentide and Scandinavian Ice  
67 Sheets and associated icebergs and freshwater (Renssen et al., 2009, 2012; Zhang et al., 2016).  
68 Consequently, maximum temperatures were a few thousand years later than the peak insolation,  
69 punctuated by a short-lived cooling event around 8.2ka B.P. associated with the final major  
70 freshwater discharge event of the Laurentide Ice Sheet (Barber et al., 1999; Rohling and Pälike,  
71 2005). Thereafter, as insolation declined so sea surface temperatures declined steadily, or by some  
72 estimates, in a more step-like manner (e.g. Calvo et al., 2002; Risebrobakken et al., 2010). For  
73 example, Birks and Koç (2002), Andersen et al. (2004) and Berner et al. (2011) all found that  
74 August SSTs at 67°N (core MD95-2011) were 4-5°C warmer than today from ~9000-6500 years  
75 B.P., then steadily declined. These analyses were based on diatoms, but similar results (albeit with  
76 a smaller change in temperature, ~2.5°C, perhaps reflecting a different seasonal bias) were  
77 obtained in a study of alkenones from the same core (Calvo et al., 2002). Studies further north,  
78 paint a similar picture (Sarnthein et al., 2003; Risebrobakken et al., 2003, 2010; Werner et al.,  
79 2014). This pattern of maximum SSTs in the first half of the Holocene and cooling thereafter is  
80 seen throughout the eastern North Atlantic, in all proxies that are indicative of conditions in the  
81 photic zone (Rimbu et al., 2003; Leduc et al., 2010; Sejrup et al., 2016). The timing of the onset  
82 of cooling varies, but cooling was well underway by ~5.5ka B.P., in what some refer to as a  
83 “transition period” that subsequently led to much cooler conditions in the late Holocene (after  
84 3.5ka B.P.) (e.g. Aagaard-Sorensen et al., 2014; Andersen et al., 2004; Leduc et al., 2010; Sejrup  
85 et al., 2016). Although there were short-lived cooling episodes superimposed on the overall first  
86 order pattern of temperature change (e.g. Werner et al., 2014), there is no evidence for quasi-  
87 periodic cooling episodes disrupting the northward flux of Atlantic water, as described by Bond et  
88 al (1997). Proxies of sub-surface conditions (below the mixed layer) – Mg/Ca ratios and oxygen  
89 isotopes in forams, as well as foram assemblage changes – generally do not show the same pattern  
90 of pan-Holocene cooling as the SST proxies, often indicating slight warming through the Holocene  
91 (e.g. Andersson et al., 2010; Sejrup et al., 2011). But these records also do not show a pattern of  
92 quasi-periodic cooling events. Could this be because of low resolution in sampling, or poor

93 chronologies? This seems very unlikely as many of these records are from high-deposition rate  
94 sites, providing high resolution records that are generally well-dated (e.g. Berner et al., 2011).  
95 Indeed, one exceptionally well-dated, high resolution sediment core from the Storegga Slide region  
96 (90 AMS  $^{14}\text{C}$  dates over 8000 calendar years) provides oxygen isotope data on planktonic forams  
97 at a resolution of  $\pm 20$  years within the core of the Norwegian Atlantic Current at  $\sim 64^\circ\text{N}$ . This  
98 clearly shows multi-decadal to century-scale variability throughout the last 8000 years, but none  
99 of the cold water flux episodes that one would expect to see, based on the work of Bond et al.  
100 (1997). We therefore conclude that there is no signal of a 4.2ka B.P. event in paleoceanographic  
101 proxies from regions influenced by the flux of warm water from the sub-tropical Atlantic into the  
102 Nordic Seas. Cooling of the sea surface had set in more than a millennium earlier in this region.

103         Next, we consider studies in the western part of the North Atlantic, north of Iceland on the  
104 Icelandic Shelf, and further to the west, near Denmark Strait. Here, many studies have examined,  
105 *inter alia*, foraminiferal assemblages, coccoliths, dinoflagellate cysts and sea-ice biomarkers and  
106 ice-rafted debris (IRD) reflecting transport of material in the cold East Greenland Current (e.g.  
107 Andrews et al., 1997; Jennings et al., 2002; Giraudeau et al., 2004; Solignac et al., 2006; Sicre et  
108 al., 2008; Justwan et al., 2008; Perner et al., 2015; Moossen et al., 2015; Cabedo-Sanz et al., 2016;  
109 Kolling et al., 2017). In this region, warmest conditions occurred around  $6.0 \pm 1.5$ ka B.P. (the  
110 timing depending on location); these conditions were associated with minimal input of IRD,  
111 reflecting the recession of tidewater glaciers onto land along the eastern coast of Greenland, and a  
112 weak East Greenland Current, with minimal stratification of the water column at that time as the  
113 flux of warmer, more saline Irminger Current water increased (Justwan et al., 2008; Jennings et  
114 al., 2011; Werner et al., 2014; Telesinski et al., 2014; Perner et al., 2016). Conditions began to  
115 change by  $\sim 5.0 \pm 0.5$ ka B.P. (the timing varying geographically) when cold water diatoms and  
116 forams, sea-ice (as tracked by the biomarker index,  $\text{IP}_{25}$ ) and IRD started to increase, and the water  
117 column became more stratified as the East Greenland Current strengthened (Moros et al., 2006;  
118 Telesinski et al., 2014; Perner et al., 2016; Kristiansdottir et al., 2017). These changes correspond  
119 to the re-advance of glaciers in East Greenland, part of the much more widespread onset of  
120 neoglaciation that is well-documented in many regions around the North Atlantic (Solomina et al.,  
121 2015). Warmer conditions (related to a strengthened Irminger Current) developed over the past  
122 2000 years, but this period is also characterized by a series of minor fluctuations in the extent of  
123 ice in the region, with much colder conditions after  $\sim 1.0$ ka B.P. when the coldest conditions of the

124 last 8000 years occurred, with abundant IRD and sea-ice in Denmark Strait and off the north coast  
125 of Iceland (Bendle and Rosell-Mele, 2007; Andresen et al., 2013; Cabedo-Sanz et al., 2016; Kolling  
126 et al., 2017). None of these records show evidence of an unusual anomaly at 4.2ka B.P.; rather, the  
127 overall cooling of the late Holocene began 500-1000 years earlier (cf. Orme et al., 2018). Similar  
128 variability is also seen further south and southwest of Iceland, at ~59°N (Farmer et al., 2008; Moros  
129 et al., 2012; Orme et al., 2018) though there is evidence from dinocysts for an anomaly in the  
130 seasonality of SSTs at ~4.5ka B.P., perhaps related to a westward shift in the Sub-Polar Gyre,  
131 allowing warmer Atlantic water to influence the site (van Nieuwenhove et al., 2018).

132 This review of paleoceanographic studies extending from southern Greenland to Fram  
133 Strait, and from western Svalbard and the southern Barents Sea southward to 60°N, provides no  
134 evidence for a significant change in major oceanographic conditions that could be linked to the  
135 4.2ka B.P. climate anomaly seen elsewhere. Rather, the evidence points to a more gradual change  
136 that was well under way by ~5ka B.P., from the relatively warm conditions of the early Holocene  
137 (driven by precessional forcing) to much colder conditions that have characterized the last 3  
138 millennia.

139

### 140 **3. Terrestrial records from around the North Atlantic**

#### 141 **3.1 Eastern Greenland and the Greenland Ice sheet**

142 Lake sediment records from sites along the coast of eastern Greenland provide a record of  
143 Holocene environmental conditions that generally reinforce the paleoceanographic evidence  
144 discussed earlier. A “Holocene Thermal Maximum” (characterized *inter alia* by longer ice-free  
145 conditions, higher levels of lacustrine productivity, increased evaporation, more tundra vegetation  
146 and higher levels of terrestrial plant material transferred to lakes) is clearly seen from ~8ka B.P.  
147 (or earlier) to ~5.0±0.5ka B.P (e.g. Kaplan et al., 2002; Andresen et al., 2004; Schmidt et al., 2011;  
148 Balascio et al., 2013; Wagner and Bennike, 2015; Axford et al., 2017; van der Bilt et al., 2018a).  
149 Thereafter, conditions became colder, often with a decline in vegetation cover, an increase in the  
150 flux of coarse-grained sediments, and a shift in the types of chironomids and diatoms present,  
151 towards species that thrive in cooler conditions. At the same time, in glacierized watersheds, the  
152 growth of glaciers led to an increase in the flux of minerogenic material which is a diagnostic  
153 signal of the onset of late Holocene neoglaciation across the region. In Kulusuk Lake (65°N on  
154 the coast of southeastern Greenland) this change occurred at ~4.2ka B.P., when there was an abrupt

155 increase in clastic sediments from glaciers that had probably disappeared during the mid-Holocene  
156 warm period (Balascio et al., 2015). A similar transition is seen in sediments from nearby Ymer  
157 Lake, where a higher frequency of avalanches and a longer season with ice-cover is thought to  
158 have favored the transfer of coarser material into the lake after ~4ka B.P. (van der Bilt et al., 2018).  
159 At another site in the same region, the Holocene thermal maximum was identified (via the  
160 evaporative enrichment of  $\delta D$  in leaf wax n-alkanes) from 8.4 to 4.1ka B.P, followed by a decrease  
161 in evaporation as the open water season became shorter. At the same time, there was an increase  
162 in the flux of clastic sediments and terrestrial organic material into the lake as river runoff increased  
163 (Balascio et al., 2013). In all of these studies, it is clear that there was a fairly rapid transition from  
164 warm mid-Holocene conditions to the colder, wetter late Holocene that encompassed the 4.2ka  
165 B.P. interval of interest. In some cases, there is evidence for a short-lived “event” at around that  
166 time (e.g., at Kulusuk Lake; Balascio et al., 2015) but this appears to be simply a part of the overall  
167 deterioration in climate that led to ice growth across the region. There is currently no evidence for  
168 a more widespread glacial advance at 4.2ka B.P. Given that cooling was persistent over the last  
169 5000 years, and the elevational threshold for glacierization is close to mountain tops across the  
170 region (declining in elevation poleward) it is understandable that different locations would have  
171 experienced the onset of neoglaciation at different times (cf. Geirsdottir et al., 2019). However,  
172 as the ELA continued to lower over the last 3-4 millennia, glaciers that had greatly diminished in  
173 size, or disappeared entirely, during the warmest period of the Holocene were eventually  
174 regenerated, with the exact timing varying across the region. In the case of Kulusuk Lake, it seems  
175 reasonable to conclude that the steady decline in temperatures and the specific hypsography of that  
176 basin led to a short-lived positive mass balance, with early ice growth and associated sediment  
177 input to the lake around 4.2ka B.P. This was the first of several advances within the Neoglacial  
178 period.

179 Ice cores from Greenland provide records of past climate variations from oxygen isotopes,  
180 glaciochemistry and physical characteristics, which are broadly consistent with those from coastal  
181 lake sediments. Alley and Anandakrishnan (1995) examined evidence for summer melting in the  
182 GISP2 ice core, as recorded by changes in the physical properties of the ice. Their analysis was at  
183 a relatively low resolution, but they showed maximum Holocene summer temperatures from  
184 ~7.5ka B.P., followed by a two-step transition to colder conditions, from ~6.5 to 5.5ka B.P., and  
185 ~4.5 to 4ka B.P., with persistently low summer temperatures (minimal melting) thereafter. After

186 adjusting for ice thickness changes, Vinther et al. (2009) also showed that there was an overall  
187 decline in temperature at the Summit of the Greenland Ice Sheet (73°N, 3210 masl) over the last  
188 ~9,000 years (interpreted from changes in  $\delta^{18}\text{O}$  in the GISP2 ice core). The mean temperature of  
189 the warmest and coldest millennia (7-8ka and 0-1ka b2k, respectively) differ by  $\sim 2.35^\circ\text{C}$   
190 (assuming no change in the seasonality of snowfall on the ice sheet). Superimposed on the long-  
191 term temperature decline there were multidecadal anomalies on the order of  $\pm 1^\circ\text{C}$ . One of the  
192 largest of the negative anomalies after the well-known 8.2ka B.P. event began  $\sim 4400$  b2k and  
193 reached a minimum at 4340 b2k, but by 4200 b2k, temperatures had sharply increased (Figure 3).  
194 In the Vinther et al. (2009) reconstruction (Figure 3a, which combines data from Renland and  
195 Agassiz Ice Caps), this appears to be driven mainly by the record from Agassiz Ice Cap on  
196 Ellesmere Island (Figure 3b); nothing comparable is seen in oxygen isotopic records from Summit  
197 or Renland (Figures 3b, 3c), or in the Summit temperature reconstruction of Kobashi et al. (2017),  
198 based on the differential diffusion of argon and nitrogen isotopes in firn prior to its densification  
199 into ice (Figure 3d). However,  $\delta^{18}\text{O}$  in chironomid head capsules from a lake in northwest  
200 Greenland also recorded the highest values of the last  $\sim 6000$  years at  $\sim 4.2$ ka B.P. (Lasher et al.,  
201 2017) and at Camp Century, there was a local isotopic maximum shortly before 4000 B.P. (Figure  
202 3b). In Murray Lake (northeastern Ellesmere Island), relatively warm conditions at  $\sim 4.2$ ka B.P.  
203 were reconstructed from varve thickness (Cook et al., 2009). Similarly, Gkinis et al. (2014) found  
204 an abrupt increase in temperature in the NorthGRIP ice core at  $\sim 4200$  b2k after deconvolving the  
205 isotopic record to take into account diffusion effects that have smoothed the signal. However, this  
206 technique is very sensitive to the assumptions made about the past accumulation rate, as diffusion  
207 is a function of both past accumulation and temperature. For example, a 15% reduction in  
208 accumulation would reduce an apparent temperature anomaly from  $5^\circ\text{C}$  to  $3.5^\circ\text{C}$  (Gkinis, pers.  
209 comm.). Under the assumption of no changes in accumulation rate, Gkinis et al. (2014) identify a  
210 warm period in the North GRIP core at 4.2ka B.P. and refer to this as the “*mid-Holocene optimum*”.  
211 It will be interesting to see if this technique, when applied to other ice cores, reveals more details  
212 about short-term temperature fluctuations that may have been obscured by diffusion effects. But  
213 for now, only 3 records, from northwest Greenland and northern Ellesmere Island, point to short-  
214 lived warmer conditions at  $\sim 4.2$ ka B.P., in contrast to the majority of records that indicate  
215 temperatures were declining at that time.

216

217 **3.2 Iceland**

218 We did not undertake a review of the literature on the Holocene paleoclimatology of Iceland as  
219 that is well summarized by Geirsdóttir et al (2019). They conclude that Neoglaciation in Iceland  
220 had begun by 5ka B.P. but different topography and proximity to the ocean led to varying  
221 environmental effects across the island. Several step-like changes occurred during the last 5ka  
222 B.P., culminating in the most extensive glacier advances during the last millennium. One of the  
223 step-like changes occurred at ~4.5-4.0ka B.P, and they conclude that this is indistinguishable from  
224 a “4.2ka B.P. event”. They note that the eruption of Hekla at 4.2ka deposited at  $\geq 1$ cm of tephra  
225 over 80% of Iceland, so the direct effects on the landscape at that time complicate the detection of  
226 a signal that may be related to other forcing factors. Of the two lakes in NE Greenland that did  
227 not have a tephra in the sediments, one (Skoravatn) shows an abrupt change at 4.2ka B.P., while  
228 the other (Tröllkonuvatn) does not.

229

230

231 **3.3 Svalbard**

232 Lake sediment records from Svalbard record changes in climate at the northernmost limit of North  
233 Atlantic water (the West Spitsbergen Current). All studies describe a warm early Holocene phase  
234 when many of the glaciers seen today were small or absent (Farnsworth, 2018). On Amsterdamoya,  
235 at the northwestern edge of Svalbard, warm and dry conditions spanned the interval from 7.7 to  
236 5ka B.P.; glaciers were small or absent by 8.4ka B.P., only re-forming in the late Holocene (Gjerde  
237 et al., 2018; de Wet et al., 2018). To the south, on the Mitrahalvoya Peninsula, there is also  
238 evidence that glaciers reached their minimum size by the mid-Holocene, but subsequently re-  
239 formed or re-advanced. Karlbreen began to grow around 3.5ka B.P. (Røthe et al., 2015) but in the  
240 neighboring watershed of Hajeren an abrupt increase in minerogenic sediments at 4.25 ka B.P.  
241 registered the onset of neoglaciation in that basin (van der Bilt et al., 2015). Paleotemperature  
242 estimates (from alkenones) in the same record indicate this advance was triggered by an abrupt  
243 drop in temperature at that time; thereafter, temperatures remained low (van der Bilt et al., 2018b).  
244 Other records from the region indicate that the first neoglacial advances of glaciers occurred  
245 around 4.6ka B.P. (e.g. Svendsen and Mangerud, 1997; Reusche et al., 2014).

246

247 **3.4 Scandinavia**



248 As most glaciers in Scandinavia had their largest areal extent during the “Little Ice Age” (~A.D.  
249 1400-1850), information about past glaciers in Norway during the late Holocene is based on  
250 reconstructions from indirect evidence, mainly sediments deposited in distal glacier-fed lakes (e.g.  
251 Nesje 2009, Bakke et al., 2010; 2013). After several large glacier advances in the earliest Holocene,  
252 the climate was generally warm during the early Holocene (8.5-6.5ka B.P.) and most glaciers  
253 melted away completely (Nesje 2009) (Figure 4). Around 6 ka B.P. glaciers start to re-grow mainly  
254 as a function of decreasing summer insolation over the Northern Hemisphere (Wanner et al. 2008).  
255 The regrowth of glaciers follows a pattern of gradual increases in glacier size interrupted by  
256 smaller glacier advances (Bakke et al, 2010, 2013; Vasskog et al., 2012). Along a coastal south-  
257 north transect through Scandinavia, different locations have experienced the onset of neoglaciation  
258 at different times, mainly as a function of altitude (cf. Geirsdóttir et al., 2018). By 2ka B.P. many  
259 glaciers had reached present day size, but maximum glacier extent was in the 18<sup>th</sup> century, during  
260 the Little Ice Age (Nesje 2009). A review of more than 20 papers shows that none of them indicate  
261 any abrupt anomalous change in glacier extent connected to a perturbation of climate around 4.2  
262 ka. (Bakke et al., 2005a; 2005b; 2008; 2010; 2013; Dahl and Nesje; 1992; 1994; 1996; Lauritzen  
263 1996; Snowball and Sandgren, 1996; Seierstad et al., 2002; Lie et al., 2004; Nesje et al. 2009;  
264 Vasskog et al., 2011; 2012 Støren et al., 2008; Wittmeier et al., 2015; Shakesby et al., 2007;  
265 Kvisvik et al., 2015, Gjerde et al., 2016). Investigating this further, we examined other terrestrial  
266 evidence mainly pollen, macrofossil and diatom records derived from lake sediments (e.g. Bjune  
267 et al., 2005; Velle et al., 2005). They have a time resolution somewhat lower than the glacier  
268 reconstructions (typical 500 yr spacing) but they all reflect the general decrease in summer  
269 insolation over the northern hemisphere and no abrupt transition close to 4.2ka B.P. (Bjune, 2005;  
270 Bjune et al., 2004, 2006; Velle et al., 2005). The only terrestrial evidence from Scandinavia that  
271 shows a clear anomaly close to 4.2ka B.P. is a speleothem record of  $\delta^{18}\text{O}$  from Northern Norway  
272 which records a short-lived temperature maximum (isotopic minimum) at ~4ka, before rapidly  
273 decreasing to much colder temperatures at ~3.7ka B.P. (Lauritzen and Lundberg 1999). However,  
274 a speleothem from a nearby cave (Okshola) does not show a comparable anomaly at this time  
275 (Linge et al., 2009).

276

#### 277 **4. Conclusions**

278 A review of paleoceanographic and terrestrial paleoclimatic data from around the northern North  
279 Atlantic reveals no compelling evidence for a significant and widespread climatic anomaly at  
280 ~4.2ka B.P. (i.e., an “event”) in most areas. In particular, there is no supporting evidence for “cool,  
281 ice-bearing surface waters... penetrating well into the core of the North Atlantic Current” at that  
282 time, as described by Bond et al., (2001). The region experienced relatively warm conditions from  
283 6-8ka B.P. followed by a general decline in temperatures after ~5ka B.P., signaling the onset of  
284 Neoglaciation. Over the last 5000 years, a series of multi-decadal to century scale fluctuations  
285 occurred, superimposed on an overall decline in temperature. Against this background of declining  
286 temperatures, three records in northwest Greenland and Ellesmere Island show an unusual warm  
287 anomaly around 4.2ka B.P., and a few others (in SE Greenland, Iceland and western Svalbard)  
288 show a cold anomaly, associated with a glacial advance. We interpret these as local events --  
289 simply one glacial advance of many that occurred in response to the overall climatic deterioration  
290 that characterized the late Holocene.

291

## 292 **References**

- 293 Aagaard-Sørensen, S., Husum, K., Hald, M., Marchitto, T., and Godtliobsen, F.: Sub-sea surface  
294 temperatures in the Polar North Atlantic during the Holocene: Planktic foraminiferal Mg/Ca  
295 temperature reconstructions, *The Holocene*, 24 (1), 93-103, **2014**.
- 296 Alley, R.B. and Anandakrishnan, S.: Variations in melt-layer frequency in the GISP2 ice core:  
297 implications for Holocene summer temperatures in central Greenland, *Annals of Glaciology*,  
298 21, 64–70, **1995**.
- 299 Andersen, C., Koc, N., Jennings, A., and Andrews, J.T.: Nonuniform response of the major surface  
300 currents in the Nordic Seas to insolation forcing: implications for the Holocene climate  
301 variability, *Paleoceanography and Paleoclimatology*, 19 (2), **2004**.
- 302 Andersson, C., Pausata, F.S.R., Jansen, E., Risebrobakken, B., and Telford, R. J.: Holocene trends  
303 in the foraminifer record from the Norwegian Sea and the North Atlantic Ocean, *Climate of*  
304 *the Past*, 6, 179–193, **2010**.
- 305 Andresen, C.S., Björck, S., Bennike, O. and Bond, G.: Holocene climate changes in southern  
306 Greenland: evidence from lake sediments, *J. Quaternary Science*, 19 (8), 783-795, **2004**.

307 Andresen, C.S., Hansen, M.J., Seidenkrantz, M.S., Jennings, A.E., Knudsen, M.F., Nørgaard-  
308 Pedersen, N., Larsen, N.K., Kuijpers, A. and Pearce, C.: Mid-to late-Holocene oceanographic  
309 variability on the Southeast Greenland shelf, *The Holocene*, 23 (2), 167-178, **2013**.

310 Andrews, J.T., Smith, L.M., Preston, R., Cooper, T. and Jennings, A.E.: Spatial and temporal  
311 patterns of iceberg rafting (IRD) along the East Greenland margin, ca. 68°N, over the last 14  
312 cal. Ka, *J. Quaternary Science* 12, 1–13, **1997**.

313 Andrews, J.T., Bigg, G.R. and Wilton, D.J.: Holocene ice-rafting and sediment transport from the  
314 glaciated margin of East Greenland (67-70°N) to the N. Iceland shelves: detecting and  
315 modeling changing sediment sources, *Quaternary Science Reviews*, 91, 204-217, **2014**.

316 Axford, Y., Levy, L.B., Kelly, M.A., Francis, D.R., Hall, B.L., Langdon, P.G. and Lowell, T.V.:  
317 Timing and magnitude of early to middle Holocene warming in East Greenland inferred from  
318 chironomids, *Boreas* 46 (4), 678–687, **2017**.

319 Bakke, J., Nesje, A., Dahl, S.O.: Utilizing physical sediment variability in glacier-fed lakes for  
320 continuous glacier reconstructions during the Holocene, northern Folgefonna, western  
321 Norway, *The Holocene* 15 (2), 161–176, **2005a**.

322 Bakke, J., Dahl, S. O., Paasche, Ø., Løvlie, R. and Nesje, A.: Glacier fluctuations, equilibrium-  
323 line altitudes and palaeoclimate in Lyngen, northern Norway, during the Lateglacial and  
324 Holocene, *The Holocene*, 15 (4), 518-540, **2005b**.

325 Bakke, J., Lie, Ø., Dahl, S.O., Nesje, A. and Bjune, A.E.: Strength and spatial patterns of the  
326 Holocene wintertime westerlies in the NE Atlantic region, *Global and Planetary Change*, 60,  
327 (1-2), 28-41, **2008**.

328 Bakke, J., Dahl, S.O., Paasche, Ø., Simonsen, J.R., Kvisvik, B., Bakke, K. and Nesje, A.: A  
329 complete record of Holocene glacier variability at Austre Okstindbreen, northern Norway: an  
330 integrated approach, *Quaternary Science Reviews*, 29 (9), 1246–1262, **2010**.

331 Bakke, J., Trachsel, M., Kvisvik, B.C., Nesje, A. and Lyså, A.: Numerical analyses of a multi-  
332 proxy data set from a distal glacier-fed lake, Sørsendalensvatn, western Norway, *Quaternary*  
333 *Science Reviews*, 73, 182-195, **2013**.

334 Balascio, N.L., D'Andrea, W.J., Bradley, R.S., Perren, B.B.: Biogeochemical evidence for  
335 hydrologic changes during the Holocene in a lake sediment record from Southeast Greenland,  
336 *The Holocene* 23 (10), 1428–1439, **2013**.

337 Balascio, N.J., D'Andrea, W.J. and Bradley, R.S.: Glacier response to North Atlantic climate  
338 variability during the Holocene, *Climate of the Past*, 11, 1587-1598, **2015**.

339 Barber, D.C., Dyke, A., Hillaire-Marcel, C., Jennings, A.E., Andrews, J.T., Kerwin, M.W.,  
340 Bilodeau, G., McNeely, R., Southon, J., Morehead, M.D. and Gagnon, J.M.: Forcing of the  
341 cold event of 8,200 years ago by catastrophic drainage of Laurentide lakes, *Nature*, 400,  
342 (6742), 344-348, **1999**.

343 Bendle, J.A., and Rosell-Melé, A.: High-resolution alkenone sea surface temperature variability  
344 on the North Icelandic Shelf: implications for Nordic Seas palaeoclimatic development during  
345 the Holocene, *The Holocene*, 17 (1), 9-24, **2007**.

346 Berner, K.S., Koç, N., Godtlielsen, F., and Divine, D.: Holocene climate variability of the  
347 Norwegian Atlantic Current during high and low solar insolation forcing, *Paleoceanography*  
348 *and Paleoclimatology*, 6 (2), PA2220, **2011**.

349 Bond, G., Showers, W., Cheseby, M., Lotti, R., Almasi, P., Priore, P., Cullen, H. and Bonani, G.:  
350 A pervasive millennial-scale cycle in North Atlantic Holocene and glacial climates, *Science*,  
351 78 (5341), 1257-1266, **1997**.

352 Bond, G., Kromer, B., Beer, J., Muscheler, R., Evans, M.N., Showers, W., Hoffmann, S., Lotti-  
353 Bond, R., Hajdas, I. and Bonani, G.: Persistent solar influence on North Atlantic climate  
354 during the Holocene, *Science*, 294 (5549), 2130-2136, **2001**.

355 Bjune, A.E.: Holocene vegetation history and tree-line changes on a north–south transect crossing  
356 major climate gradients in southern Norway – evidence from pollen and plant macrofossils in  
357 lake sediments, *Review of Palaeobotany and Palynology*, 133, 249–275, **2005**.

358 Bjune, A.E., Bakke, J., Nesje, A., Birks, H.J.B.: Holocene mean July temperature and winter  
359 precipitation in western Norway inferred from palynological and glaciological lake-sediment  
360 proxies, *The Holocene*, 15, 177–189, **2005**.

361 Bjune, A.E., Birks, H.J.B., Seppä, H.: Holocene vegetation and climate history on a continental –  
362 oceanic transect in northern Fennoscandia based on pollen and plant macrofossils, *Boreas*, 33,  
363 211–223, **2004**.

364 Cabedo-Sanz, P., Belt, S. T., Jennings, A. E., Andrews, J. T., and Geirsdóttir, Á.: Variability in  
365 drift ice export from the Arctic Ocean to the North Icelandic Shelf over the last 8000 years: a  
366 multi-proxy evaluation, *Quaternary Science Reviews*, 146, 99-115, **2016**.

367 Calvo, E., Grimalt, J., and Jansen, E.: High resolution U37K sea surface temperature  
368 reconstruction in the Norwegian Sea during the Holocene, *Quaternary Science Reviews*, 21  
369 (12-13), 1385-1394, **2002**.

370 Dahl, S.O. and Nesje, A.: Paleoclimatic implications based on equilibrium line altitude depressions  
371 of reconstructed Younger Dryas and Holocene cirque glaciers in inner Nordfjord, western  
372 Norway, *Palaeogeography, Palaeoclimatology, Palaeoecology*, 94, 87-97, **1992**.

373 Dahl, S.O. and Nesje, A.: Holocene glacier fluctuations at Hardangerjøkulen, central-southern  
374 Norway: a high-resolution composite chronology from lacustrine and terrestrial deposits, *The  
375 Holocene*, 4, 269–277, **1994**.

376 Dahl, S.O. and Nesje, A.: A new approach to calculating Holocene winter precipitation by  
377 combining glacier equilibrium-line altitudes and pine-tree limits: a case study from  
378 Hardangerjøkulen, central southern Norway, *The Holocene*, 6, 381–398, **1996**.

379 de Wet, G., Bakke, J., D'Andrea, W.J., Balascio, N.L., Bradley, R.S. and Perren, B.B.: Holocene  
380 climate change reconstructed from proglacial lake Gjoavatnet on Amsterdamoya, N.W.  
381 Svalbard, *Quaternary Science Reviews*, 183, 188-203, **2018**.

382 Farnsworth, W.R.: *Holocene glacier history of Svalbard*. Ph.D. thesis, Department of Geosciences,  
383 The Arctic University of Norway, Trømso. 188pp, **2018**.

384 Farmer, E.J., Chapman, M.R. and Andrews, J.E.: Centennial-scale Holocene North Atlantic  
385 surface temperatures from Mg/Ca ratios in *Globigerina bulloides*, *Geochemistry, Geophysics,  
386 Geosystems*, 9 (12), **2008**.

387 Fleitmann, D., Burns, S.J., Mudelsee, M., Neff, U., Kramers, J., Mangini, A. and Matter, A.:  
388 Holocene forcing of the Indian monsoon recorded in a stalagmite from southern Oman,  
389 *Science*, 300, (5626), 1737-1739, **2003**.

390 Geirsdóttir, Á., Miller, G.H., Andrews, J.T., Harning, D.J. and Anderson, L.S.: The onset of  
391 Neoglaciation in Iceland and the 4.2ka event, *Climate of the Past*, 15, 25-40, **2019**.

392 Giraudeau, J., Jennings, A.E. and Andrews, J.T.: Timing and mechanisms of surface and  
393 intermediate water circulation changes in the Nordic Seas over the last 10,000 cal years: a  
394 view from the North Iceland shelf, *Quaternary Science Reviews*, 23 (20-22), 2127-2139, **2004**.

395 Gjerde, M., Bakke, J., Vasskog, K, Nesje, A. and Hormes, A.: Holocene glacier variability and  
396 Neoglacial hydroclimate at Ålfotbreen, western Norway, *Quaternary Science Reviews*, 133,  
397 28-47, **2016**.

398 Gjerde, M., Bakke, J., D'Andrea, W.J., Balascio, N.L., Bradley, R.S., Vasskog, K., Ólafsdóttir, S.,  
399 Røthe, T.O., Perren, B.B. and Hormes, A.: Holocene multi-proxy environmental  
400 reconstruction from Lake Hakluytvatnet, Amsterdamøya Island, Svalbard (79.5°N),  
401 *Quaternary Science Reviews*, 183, 164-176, **2018**.

402 Gkinis, V., Simonsen, S.B., Buchardt, S.L., White, J.W.C. and Vinther, B.M.: Water isotope  
403 diffusion rates from the NorthGRIP ice core for the last 16,000 years—glaciological and  
404 paleoclimatic implications. *Earth and Planetary Science Letters*, 405, 132-141, **2014**.

405 Gupta, A.K., Anderson, D.M. and Overpeck, J.T.: Abrupt changes in the Asian southwest monsoon  
406 during the Holocene and their links to the North Atlantic Ocean, *Nature*, 421 (6921), 354,  
407 **2003**.

408 Jennings, A.E., Knudsen, K.L., Hald, M., Hansen, C.V. and Andrews, J.T.: A mid-Holocene shift  
409 in Arctic sea-ice variability on the East Greenland Shelf, *The Holocene*, 12 (1), 49-58, **2002**.

410 Jennings, A., Andrews, J. and Wilson, L.: Holocene environmental evolution of the SE Greenland  
411 Shelf North and South of the Denmark Strait: Irminger and East Greenland current  
412 interactions, *Quaternary Science Reviews*, 30, 980-998, **2011**.

413 Justwan, A., Koç, N. and Jennings, A.E.: Evolution of the Irminger and East Icelandic Current  
414 systems through the Holocene, revealed by diatom-based sea surface temperature  
415 reconstructions, *Quaternary Science Reviews*, 27, 1571-1582, **2008**.

416 Kaplan, M.R., Wolfe, A.P. and Miller, G.H.: Holocene environmental variability in southern  
417 Greenland inferred from lake sediments, *Quaternary Research*, 58, 149-159, **2002**.

418 Kobashi, T., Menviel, L., Jeltsch-Thömmes, A., Vinther, B.M., Box, J.E., Muscheler, R.,  
419 Nakaegawa, T., Pfister, P.L., Döring, M., Leuenberger, M. and Wanner, H: Volcanic influence  
420 on centennial to millennial Holocene Greenland temperature change, *Scientific Reports*, 7,  
421 1441-1451, **2017**.

422 Kolling, H.M., Stein, R., Fahl, K., Perner, K. and Moros, M.: Short-term variability in late  
423 Holocene sea ice cover on the East Greenland Shelf and its driving mechanisms,  
424 *Palaeogeography, Palaeoclimatology, Palaeoecology*, 485, 336-350, **2017**.

425 Kristjánsdóttir, G.B., Moros, M., Andrews, J.T. and Jennings, A.E.: Holocene Mg/Ca, alkenones,  
426 and light stable isotope measurements on the outer North Iceland shelf (MD99-2269): A  
427 comparison with other multi-proxy data and sub-division of the Holocene, *The Holocene*, 27,  
428 52-62, **2017**.

429 Kvisvik, B., Paasche, Ø. and Dahl, S.O.: Holocene cirque glacier activity in Rondane, southern  
430 Norway, *Geomorphology*, 246, 433–444, **2015**.

431 Lasher, G.E., Axford, Y., McFarlin, J.M., Kelly, M.A., Osterberg, E.C. and Berkelhammer, M.B.:  
432 Holocene temperatures and isotopes of precipitation in Northwest Greenland recorded in  
433 lacustrine organic materials. *Quaternary Science Reviews*, 170, 45-55, **2017**.

434 Lauritzen, S-E: Calibration of speleothem stable isotopes against historical records: a Holocene  
435 temperature curve for North Norway?, *Karst Waters Institute Special Publication*, 2, 78-80,  
436 **1996**.

437 Lauritzen, S-E. and Lundberg, J.: Calibration of the speleothem delta function: an absolute  
438 temperature record for the Holocene in northern Norway, *The Holocene*, 9, 659–669, **1999**.

439 Leduc, G., Schneider, R., Kim, J.H. and Lohmann, G.: Holocene and Eemian sea surface  
440 temperature trends as revealed by alkenone and Mg/Ca paleothermometry, *Quaternary  
441 Science Reviews*, 29 (7), 989-1004, **2010**.

442 Lie, Ø., Dahl, S.O., Nesje, A., Matthews, J.A., Sandvold, S.: Holocene fluctuations of a  
443 polythermal glacier in high-alpine eastern Jotunheimen, central southern Norway, *Quaternary  
444 Science Reviews*, 23, 1925–1945, **2004**.

445 Linge, H., Lauritzen, S-E., Andersson, C., Hansen, J.K., Skogland, R. Ø. and Sundqvist, H.S.:  
446 Stable isotope records for the last 10,000 years from Okshola cave (Fauske, northern Norway)  
447 and regional comparisons. *Climate of the Past*, 5, 667-682, 2009.

448 Moossen, H., Bendle, J., Seki, O., Quillmann, U. and Kawamura, K.: North Atlantic Holocene  
449 climate evolution recorded by high-resolution terrestrial and marine biomarker records,  
450 *Quaternary Science Reviews*, 129, 111-127, 2015.

451 Moros, M., Andrews, J.T., Eberl, D.D. and Jansen, E.: Holocene history of drift ice in the northern  
452 North Atlantic: Evidence for different spatial and temporal modes, *Paleoceanography*, 21 (2),  
453 **2006**.

454 Moros, M., Jansen, E., Oppo, D.W., Giraudeau, J. and Kuijpers, A: Reconstruction of the late-  
455 Holocene changes in the Sub-Arctic Front position at the Reykjanes Ridge, north Atlantic,  
456 *The Holocene*, 22 (8), 877-886, **2012**.

457 Nesje, A.: Latest Pleistocene and Holocene alpine glacier fluctuations Scandinavia, *Quaternary  
458 Science Reviews*, 28 (21-22), 2119-2136, **2009**.

459 Nesje, A., Matthews, J.A., Dahl, S.O., Berrisford, M.S., Andersson, C.: Holocene glacier  
460 fluctuations of Flatebreen and winter precipitation changes in the Jostedalsbreen region,  
461 western Norway, based on glaciolacustrine records, *The Holocene* 11, 267–280, **2001**.

462 Nesje, A., Jansen, E., Birks, H.J.B., Bjune, A.E., Bakke, J., Andersson, C., Dahl, S.O., Klitgaard-  
463 Kristensen, D., Lauritzen, S.-E., Lie, Ø., Risebrobakken, B., Svendsen, J.-I.: Holocene climate  
464 variability in the Northern North Atlantic Region: a review of terrestrial and marine evidence.  
465 In: Drange, H., Dokken, T., Furevik, T., Gerdes, R. and Berger, W. (Eds.), *The Nordic Seas:  
466 An Integrated Perspective*, Geophysical Monograph Series, 158, 289–322, **2005**.

467 Orme, L.C., Miettinen, A., Divine, D., Husum, K., Pearce, C., Van Nieuwenhove, N., Born, A.,  
468 Mohan, R. and Seidenkrantz, M.S: Subpolar North Atlantic sea surface temperature since 6  
469 ka BP: Indications of anomalous ocean-atmosphere interactions at 4-2 ka BP, *Quaternary  
470 Science Reviews*, 194, 128-142, **2018**.

471 Pèlach, A., Julià, R., Pérez-Obiol, R., Soriano, J. M., Bal, M. C., Cunill, R. and Catalan, J.:  
472 Potential influence of Bond events on mid-Holocene climate and vegetation in southern  
473 Pyrenees as assessed from Burg lake LOI and pollen records, *The Holocene*, 21 (1), 95-104,  
474 **2011**.

475 Perner, K., Moros, M., Lloyd, J.M., Jansen, E. and Stein, R.: Mid to late Holocene strengthening  
476 of the East Greenland Current linked to warm subsurface Atlantic water, *Quaternary Science  
477 Reviews*, 129, 296-307, **2015**.

478 Perner, K., Jennings, A.E., Moros, M., Andrews, J.T. and Wacker, L.: Interaction between warm  
479 Atlantic-sourced waters and the East Greenland Current in northern Denmark Strait (68°N)  
480 during the last 10600 cal a BP, *J. Quaternary Science*, 31, 472-483, **2016**.

481 Renssen, H., Seppä, H., Heiri, O., Roche, D. M., Goosse, H. and Fichet, T.: The spatial and  
482 temporal complexity of the Holocene thermal maximum, *Nature Geoscience*, 2 (6), 411, **2009**.

483 Renssen, H., Seppä, H., Crosta, X., Goosse, H. and Roche, D. M.: Global characterization of the  
484 Holocene thermal maximum, *Quaternary Science Reviews*, 48, 7-19, **2012**.

485 Reusche, M., Winsor, K., Carlson, A.E., Marcott, S.A., Rood, D.H., Novak, A., Roof, S., Retelle,  
486 M., Werner, A., Caffee, M. and Clark, P.U: 10Be surface exposure ages on the late-Pleistocene  
487 and Holocene history of Linnébreen on Svalbard, *Quaternary Science Reviews*, 89, 5-12,  
488 **2014**.



489 Rimbu, N., Lohmann, G., Kim, J.H., Arz, H.W. and Schneider, R.: Arctic/North Atlantic  
490 Oscillation signature in Holocene sea surface temperature trends as obtained from alkenone  
491 data, *Geophysical Research Letters*, 30 (6), **2003**.

492 Risebrobakken, B., Jansen, E., Andersson, C., Mjelde, E. and Hevrøy, K.: A high-resolution study  
493 of Holocene paleoclimatic and paleoceanographic changes in the Nordic Seas,  
494 *Paleoceanography*, 18 (1), **2003**.

495 Risebrobakken, B., Moros, M., Ivanova, E.V., Chistyakova, N. and Rosenberg, R.: Climate and  
496 oceanographic variability in the SW Barents Sea during the Holocene, *The Holocene*, 20 (4),  
497 609-621, **2010**.

498 Rohling, E. J. and Pälike, H.: Centennial-scale climate cooling with a sudden cold event around  
499 8,200 years ago, *Nature*, 434 (7036), 975, **2005**.

500 Roth, R. and Joos, F.: A reconstruction of radiocarbon production and total solar irradiance from  
501 the Holocene <sup>14</sup>C and CO<sub>2</sub> records: implications of data and model uncertainties, *Climate of*  
502 *the Past*, 9, 1879-1909, **2013**.

503 Røthe, T., Bakke, J., Vasskog, K., Gjerde, M., D'Andrea, W.J. and Bradley, R.S.: Arctic Holocene  
504 glacier fluctuations reconstructed from lake sediments at Mitrahelvøya, Spitsbergen,  
505 *Quaternary Science Reviews*, 109, 111-125, **2015**.

506 Sarnthein, M., Van Kreveld, S., Erlenkeuser, H., Grootes, P.M., Kucera, M., Pflaumann, U. and  
507 Schulz, M.: Centennial-to-millennial-scale periodicities of Holocene climate and sediment  
508 injections off the western Barents shelf, 75° N, *Boreas*, 32 (3), 447-461, **2003**.

509 Schmidt, S., Wagner, B., Heiri, O., Klug, M., Bennike, O. and Melles, M.: Chironomids as  
510 indicators of the Holocene climatic and environmental history of two lakes in Northeast  
511 Greenland, *Boreas*, 40, 116–130, **2011**.

512 Sejrup, H.P., Haflidason, H. and Andrews, J.T.: A Holocene North Atlantic SST record and  
513 regional climate variability, *Quaternary Science Reviews*, 30 (21-22), 3181-3195, **2011**.

514 Sejrup, H.P., Seppä, H., McKay, N.P., Kaufman, D.S., Geirsdóttir, Á., de Vernal, A., Renssen,  
515 H., Husum, K., Jennings, A. and Andrews, J.T.: North Atlantic-Fennoscandian Holocene  
516 climate trends and mechanisms, *Quaternary Science Reviews*, 147, 365-378, **2016**.

517 Shakesby, R.A., Smith, J.G., Matthews, J.A., Winkler, S., Quentin Dresser, P., Bakke, J., Dahl,  
518 S.O., Lie, Ø., Nesje, A.: Reconstruction of Holocene glacier history from distal sources:

519 glaciofluvial stream-bank mires and a glaciolacustrine sediment core near Sota Sæter,  
520 Breheimen, southern Norway, *The Holocene*, 17, 729–745, **2007**.

521 Sicre, M.A., Jacob, J., Ezat, U., Rouse, S., Kissel, C., Yiou, P., Eiríksson, J., Knudsen, K.L.,  
522 Jansen, E. and Turon, J.L.: Decadal variability of sea surface temperatures off North Iceland  
523 over the last 2000 years, *Earth and Planetary Science Letters*, 268 (1-2), 137-142, **2008**.

524 Seierstad, J., Nesje, A., Dahl, S.O. and Simonsen, J.R.: Holocene glacier fluctuations of  
525 Grovabreen and Holocene snow-avalanche activity reconstructed from lake sediments in  
526 Grningstlsvatnet, western Norway, *The Holocene*, 12 (2), 211-222, **2002**.

527 Snowball, I. and Sandgren, P.: Lake sediment studies of Holocene glacial activity in the Kårsa  
528 valley, northern Sweden: contrast in interpretation, *The Holocene*, 6, 367–372, **1996**.

529 Solignac, S., Giraudeau, J. and de Vernal, A.: Holocene sea surface conditions in the western North  
530 Atlantic: spatial and temporal heterogeneities, *Paleoceanography*, 21 (2), **2006**.

531 Solomina, O.N., Bradley, R.S., Hodgson, D.A., Ivy-Ochs, S., Jomelli, V., Mackintosh, A.N.,  
532 Nesje, A., Owen, L.A., Wanner, H., Wiles, G.C. and Young, N.E.: Holocene glacier  
533 fluctuations, *Quaternary Science Reviews*, 111, 9-34, **2015**.

534 Støren, E.N., Dahl, S.O. and Lie, Ø.: Separation of late-Holocene episodic paraglacial events and  
535 glacier fluctuations in eastern Jotunheimen, central southern Norway, *The Holocene* 18, 1179–  
536 1191, **2008**.

537 Svendsen, J. I., and Mangerud, J.: Holocene glacial and climatic variations on Spitsbergen,  
538 Svalbard, *The Holocene*, 7 (1), 45-57, **1997**.

539 Telesiński, M.M., Spielhagen, R.F. and Lind, E.M.: A high-resolution Late glacial and Holocene  
540 palaeoceanographic record from the Greenland Sea, *Boreas*, 43 (2), 273-285, **2014**.

541 Van der Bilt, W.G.M, Bakke, J., Vasskog, K., D’Andrea, W.J., Bradley, R.S. and Ólafsdóttir, S.:  
542 Reconstruction of glacier variability from lake sediments reveals dynamic Holocene climate  
543 in Svalbard, *Quaternary Science Reviews*, 126, 201-218, **2015**.

544 Van der Bilt, W.G.M., Rea, B., Spagnolo, M., Roerdink, D.I., Jorgensen, S.I. and Bakke, J.: Novel  
545 sedimentological fingerprints link shifting depositional processes to Holocene climate  
546 transitions in East Greenland, *Global and Planetary Change*, 164, 52-64, **2018a**.

547 Van der Bilt, W.G.M., D’Andrea, W.J., Bakke, J., Balascio, N.L., Werner, J.P., Gjerde M. and  
548 Bradley, R.S.: Alkenone-based reconstructions reveal four-phase Holocene temperature  
549 evolution for High Arctic Svalbard, *Quaternary Science Reviews*, 183, 204-213, **2018b**.

550 Van Nieuwenhove, N., Knudsen, M.F., Pearce, C., Røy, H. and Seidenkrantz, M.-S.: Meltwater  
551 and seasonality influence on subpolar Gyre circulation during the Holocene,  
552 *Palaeogeography, Palaeoclimatology, Palaeoecology*, 502, 104-118, **2018**.

553 Vasskog, K., Nesje, A., Støren, E.N., Waldmann, N., Chapron, E., Ariztegui, D.: A Holocene  
554 record of snow-avalanche and flood activity reconstructed from a lacustrine sedimentary  
555 sequence in Oldevatnet, western Norway, *The Holocene*, 21, 597-614, **2011**.

556 Vasskog, K., Paasche, Ø., Nesje, A., Boyle, J.F., Birks, H.J.B.: A new approach for reconstructing  
557 glacier variability based on lake sediments recording input from more than one glacier,  
558 *Quaternary Research*, 77, 192-204, **2012**.

559 Velle, G., Larsen, J., Eide, W., Peglar, S.M., Birks, H.J.B.: Holocene environmental history and  
560 climate of Råtåsjøen, a low alpine lake in south-central Norway, *J. Paleolimnology*, 33, 129–  
561 153, **2005**.

562 Vieira, L.E.A., Solanki, S.K., Krivova, N.A. and Usoskin, I.: Evolution of the solar irradiance  
563 during the Holocene, *Astronomy and Astrophysics*, 531, A6, **2011**.

564 Vinther, B., Buchardt, S.L., Clausen, H.B., Dahl-Jensen, D., Johnsen, S.J., Fisher, D.A., Koerner,  
565 R.M., Raynaud, D., Lipenkov, V., Andersen, K.K., Blunier, T., Rasmussen, S.O., Steffensen,  
566 J.P. and Svensson, A.M.: Significant Holocene thinning of the Greenland ice sheet, *Nature*,  
567 461, 385-388, **2009**.

568 Wagner, B., and Bennike, O.: Holocene environmental change in the Skallingen area, eastern  
569 North Greenland, based on a lacustrine record, *Boreas*, 44 (1), 45-59, **2015**.

570 Wang, Y., Cheng, H., Edwards, R.L., He, Y., Kong, X., An, Z., Wu, J., Kelly, M.J., Dykoski, C.A.  
571 and Li, X.: The Holocene Asian monsoon: links to solar changes and North Atlantic climate,  
572 *Science*, 308 (5723), 854-857, **2005**.

573 Wanner, H. and Bütikofer, J.: Holocene Bond Cycles: real or imaginary?, *Geografie*, 113 (4), 338-  
574 349, **2008**.

575 Wanner, H., Beer, J., Bütikofer, J., Crowley, T.J., Cubasch, U., Flückiger, J., Goosse, H.,  
576 Grosjean, M., Joos, F., Kaplan, J.O.: Mid-to late Holocene climate change: an overview,  
577 *Quaternary Science Reviews*, 27, 1791-1828, **2008**.

578 Wanner, H., Solomina, O., Grosjean, M., Ritz, S.P. and Jetel, M.: Structure and origin of Holocene  
579 cold events, *Quaternary Science Reviews*, 30, 3109-3123, **2011**.

580 Werner, K., Frank, M., Teschner, C., Müller, J. and Spielhagen, R.F.: Neoglacial change in deep  
581 water exchange and increase of sea-ice transport through eastern Fram Strait: evidence from  
582 radiogenic isotopes, *Quaternary Science Reviews*, 92, 190-207, **2014**.  
583 Wittmeier, H.E., Bakke, J., Vasskog, K., Trachsel, M.: Reconstructing Holocene glacier activity  
584 at Langfjordjøkelen, Arctic Norway, using multi-proxy fingerprinting of distal glacier-fed  
585 lake sediments, *Quaternary Science Reviews*, 114, 78-99, **2015**.  
586 Wu, C.J., Usoskin, I.G., Krivova, N., Kovaltsov, G.A., Baroni, M., Bard, E. and Solanki, S.K.:  
587 Solar activity over nine millennia: A consistent multi-proxy reconstruction, *Astronomy and*  
588 *Astrophysics*, 615, A93, **2018**.  
589 Zhang, Y., Renssen, H. and Seppä, H.: Effects of melting ice sheets and orbital forcing on the early  
590 Holocene warming in the extratropical Northern Hemisphere, *Climate of the Past*, 12, 1119-  
591 1135, **2016**.  
592

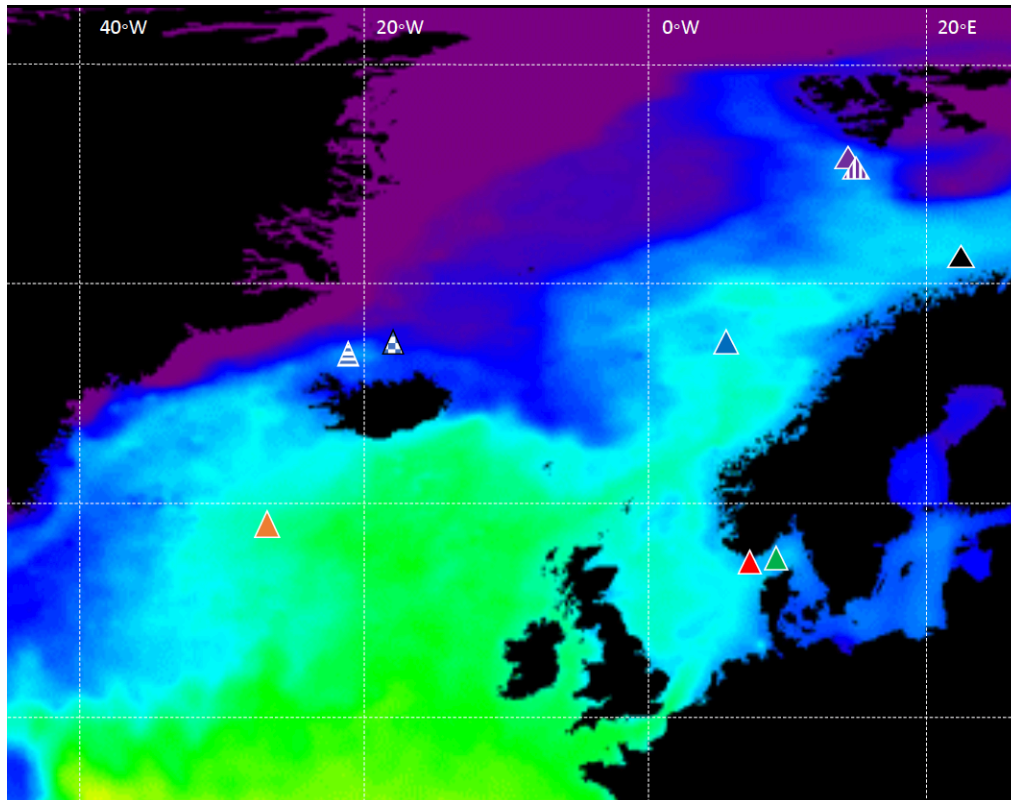

593  
594  
595 **Figure 1.** Location of sediment cores used to obtain the alkenone-based paleo SST estimates  
596 shown in Figure 2.  
597  
598

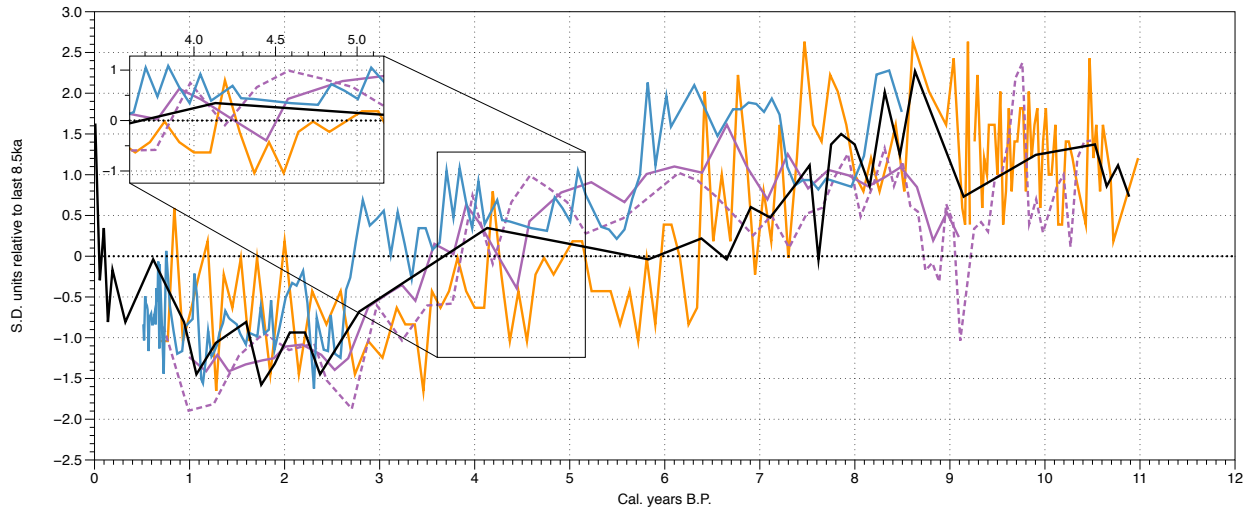

599  
600  
601  
602  
603  
604  
605  
606  
607  
608

Black = Risebrobakken et al., 2010: core PSh-5159N, 71.35N, 22.63E  
 Purple = Marchal et al., 2002: core M23258-2, 75N, 13.97E  
 Dashed Purple = Rigual-Hernández et al 2017: core SV-04, 74.957, 13.899E  
 Orange = Marchal et al., 2002: core MD95-2015, 58.76N, 25.958W  
 Blue = Calvo et al., 2002: core MD95-2011, 66.97N, 7.633E

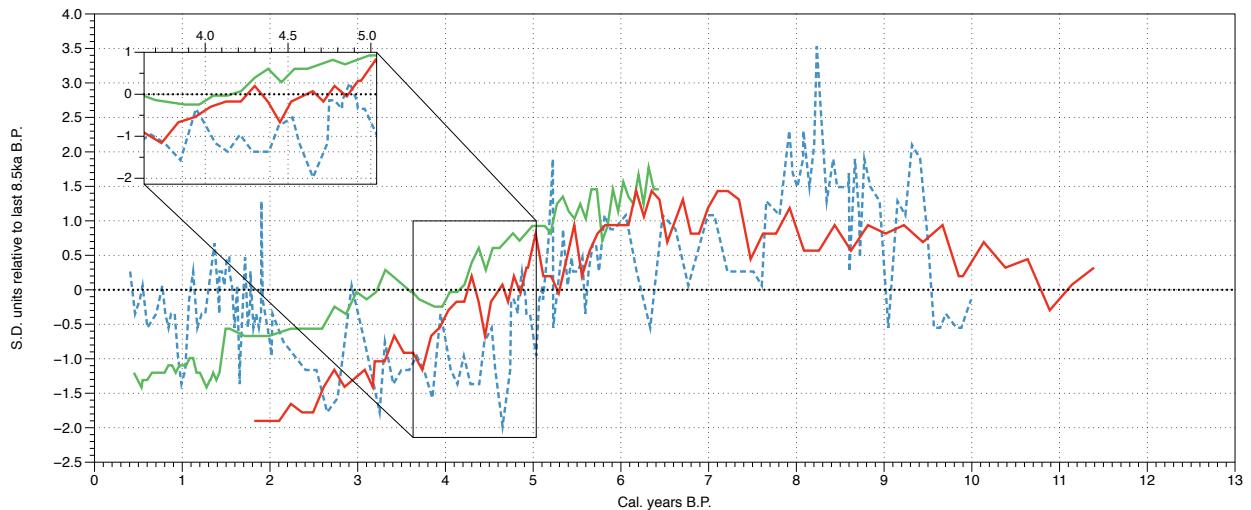

609  
610  
611  
612  
613  
614  
615  
616  
617  
618  
619

**Figure 2.** Alkenone-based paleo SST estimates from North Atlantic sites (shown in Figure 1).  
 Red = Emeis et al., 2003: core IOW 22517, 57.67N, 7.091E  
 Green = Emeis et al., 2003: core IOW 22514, 57.84N, 8.704E  
 Dashed Blue = Kristiansdottir et al., 2017: core MD2269, 66.63N, 20.85W

620 a)  
621

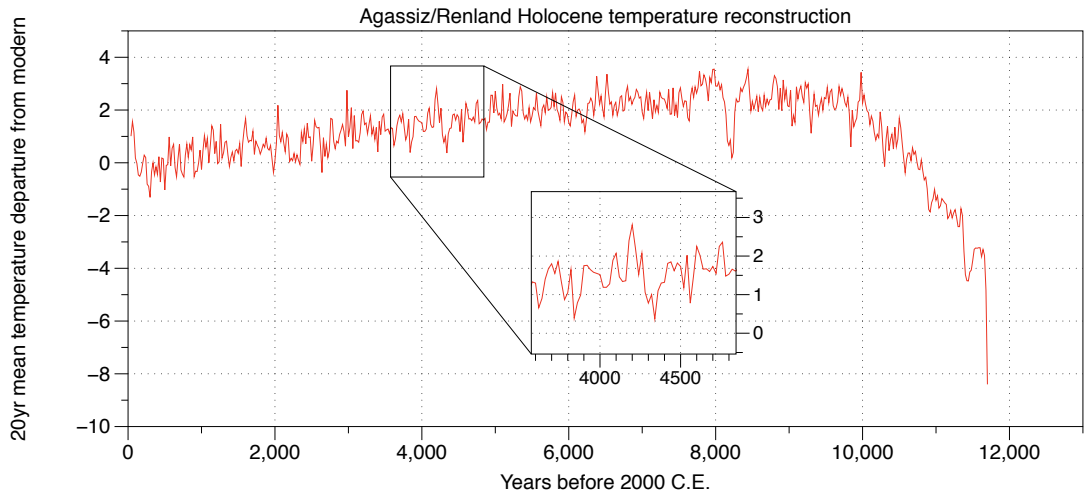

622 b)  
623

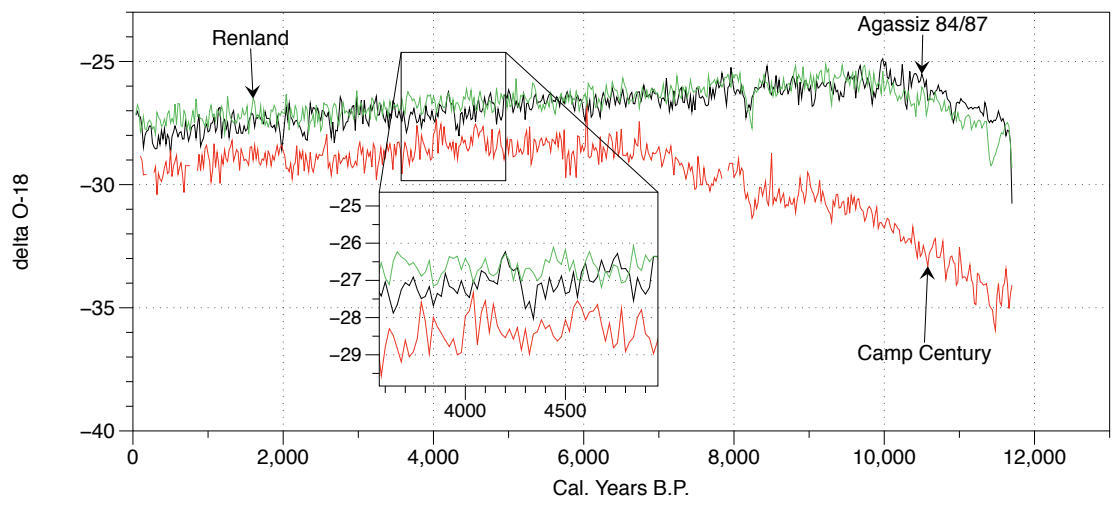

624 c)  
625

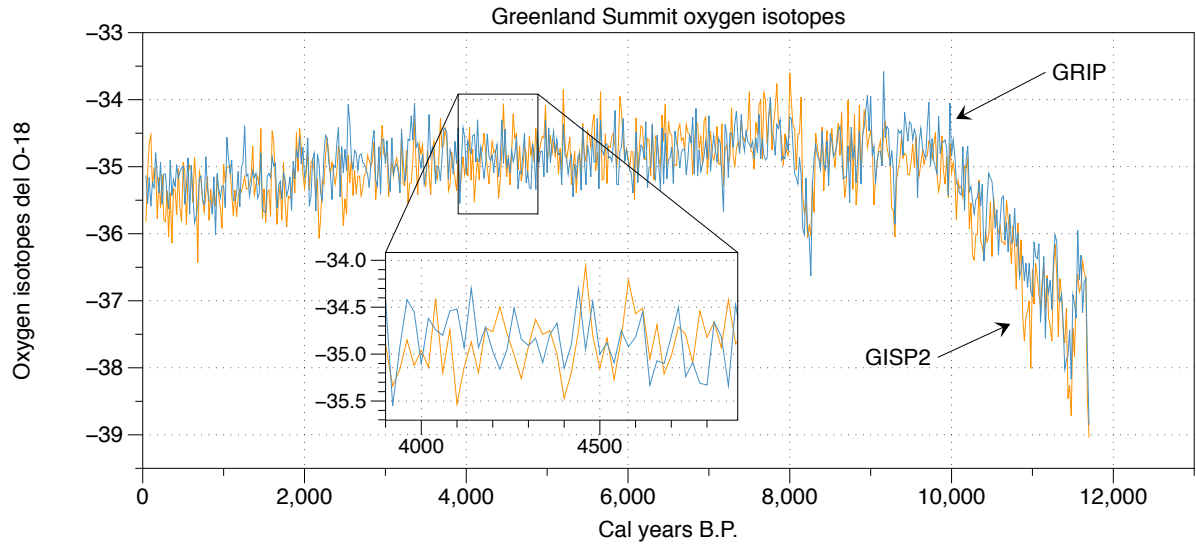

626

627 d)  
628  
629

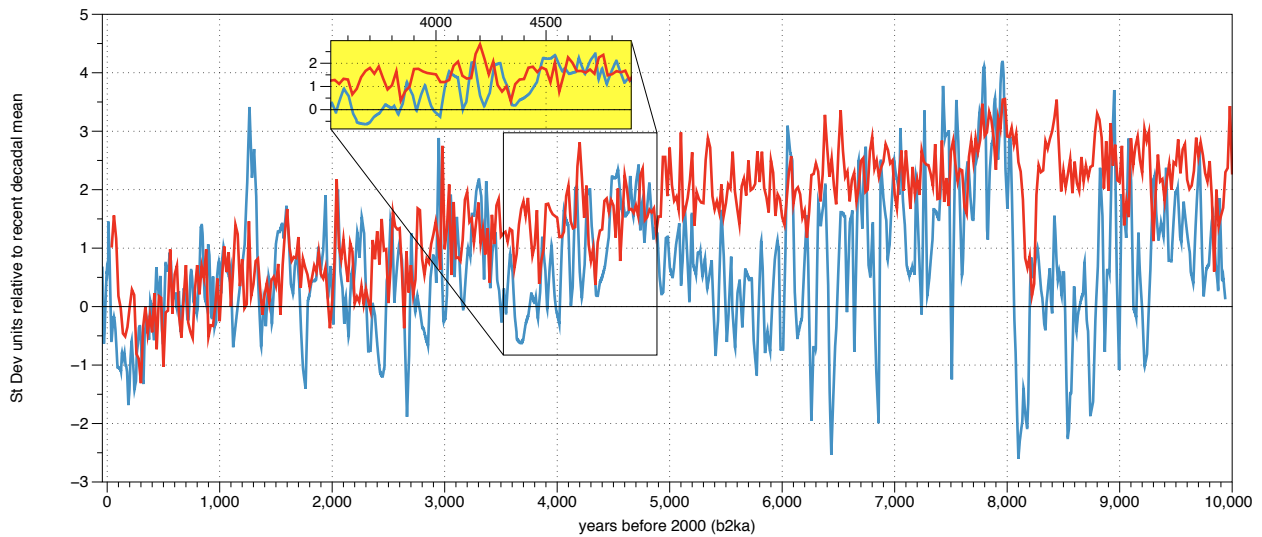

630  
631

632 **Figure 3.** a) Temperature anomalies from the smoothed estimate of present temperatures in  
633 Greenland, based on oxygen isotope records from Renland Ice Cap (East Greenland) and Agassiz  
634 Ice Cap (Ellesmere Island). Timescale is in years b2k (before A.D. 2000). The interval around  
635 4.2ka BP is enlarged in the box (Data source: Vinther et al., 2009).

636 b) Individual oxygen isotopic records from Renland and Agassiz Ice Caps (which were  
637 combined to create the record in Figure 3a), and from Camp Century

638 c) Individual oxygen isotopic records from GRIP and GISP2 at Summit, Greenland Ice Sheet

639 d) Paleotemperature estimates from argon and nitrogen isotopes (in blue) (from Kobashi et al.,  
640 2017) and from the Renland/Agassiz joint record (in red) as shown in Figure 3a (from Vinther et  
641 al., 2009).

642  
643  
644  
645  
646  
647

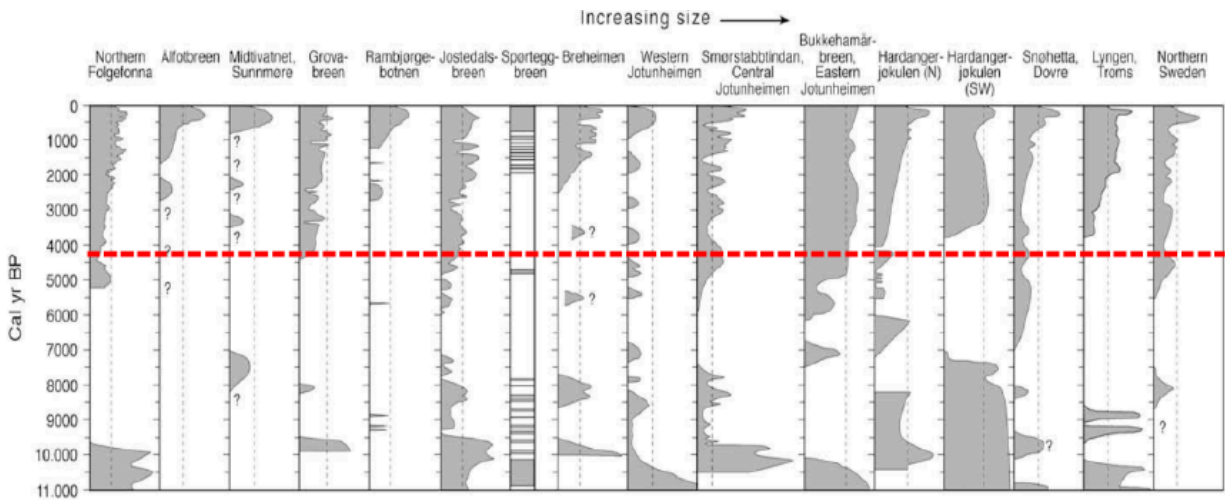

648  
 649  
 650  
 651

**Figure 4.** Summary of glacier extent in various regions of Scandinavia during the Holocene. 4.2ka B.P. is highlighted by the red dashed line (after Nesje, 2009).
